# Increased CSF-BACE I activity is associated with ApoE- $\epsilon$ 4 genotype in subjects with mild cognitive impairment and Alzheimer's disease

Michael Ewers,<sup>1,2</sup> Zhenyu Zhong,<sup>3</sup> Katharina Bürger,<sup>1</sup> Anders Wallin,<sup>4</sup> Kaj Blennow,<sup>4</sup> Stefan J. Teipel,<sup>5</sup> Yong Shen<sup>3</sup> and Harald Hampel<sup>1,2</sup>

<sup>1</sup>Department of Psychiatry, Alzheimer Memorial Center, Ludwig-Maximilian University, Munich, Germany, <sup>2</sup>Trinity College Dublin, School of Medicine, Discipline of Psychiatry & Trinity College Institute of Neuroscience (TCIN) & The Adelaide and Meath Hospital Incorporating The National Children's Hospital (AMiNCH), Dublin, Ireland, <sup>3</sup>Haldeman Laboratory of Molecular and Cellular Neurobiology, Sun Health Research Institute, Sun City, AZ, USA, <sup>4</sup>Department of Clinical Neuroscience, University of Göteborg, Sahlgren's University Hospital, Göteborg, Sweden and <sup>5</sup>Department of Psychiatry, University Rostock, Germany

Correspondence to: Prof. Harald Hampel, MD, MSc, Discipline of Psychiatry, School of Medicine, Trinity College Dublin, Trinity Centre for Health Sciences, The Adelaide and Meath Hospital Incorporating The National Children's Hospital (AMiNCH), Tallaght, Dublin 24, Ireland  
E-mail: Harald.Hampel@tcd.ie, Harald.Hampel@med.uni-muenchen.de

**The Apolipoprotein (ApoE)  $\epsilon$ 4 allele is a major genetic risk factor of Alzheimer's disease, and may affect the production of amyloid beta ( $A\beta_{1-42}$ ). Recently, we have shown that  $\beta$ -secretase (BACE I) activity can be reliably detected within the brain and human CSF. Here, we have examined an association between the ApoE genotype and CSF-levels of BACE I activity in Alzheimer's disease and mild cognitive impairment (MCI). A total of 148 subjects were included: 60 Alzheimer's disease patients, 51 MCI subjects and 37 elderly healthy controls. The CSF-levels of  $A\beta_{1-42}$ , BACE I activity and BACE protein were measured in all of these subjects. The differences between ApoE- $\epsilon$ 4 carriers and ApoE- $\epsilon$ 4 non-carriers in these CSF-based measures were determined controlling for gender, age and MMSE score. The ApoE- $\epsilon$ 4 genotype was associated with increased BACE I activity in both Alzheimer's disease ( $P=0.03$ ) and MCI ( $P=0.04$ ) subjects. Levels of  $A\beta_{1-42}$  were decreased in ApoE- $\epsilon$ 4 carriers in MCI ( $P=0.004$ ) but not Alzheimer's disease subjects. This study is the first to demonstrate the association between ApoE- $\epsilon$ 4 and CSF-BACE I activity in MCI and Alzheimer's disease subjects. The assessment of BACE I in CSF may provide a sensitive measure to detect *in vivo* alterations in the amyloidogenic processing potentially modified by the ApoE genotype.**

**Keywords:** mild cognitive impairment; cerebrospinal fluid; Alzheimer's disease; ApoE $\epsilon$ 4,  $\beta$ -amyloid.; biological marker; prediction; early detection; biological activity; cerebrospinal fluid; CSF

**Abbreviations:** ApoE = Apolipoprotein; APP = amyloid precursor protein;  $A\beta$  = beta-amyloid; CSF = cerebrospinal fluid; HC = healthy control; MCI = mild cognitive impairment

Received November 14, 2007. Revised January 25, 2008. Accepted February 13, 2008. Advance Access publication March 11, 2008

## Introduction

The Apolipoprotein (ApoE)  $\epsilon$ 4 allele is a major risk factor of Alzheimer's disease. ApoE  $\epsilon$ 4 genotype shows increased frequency in sporadic and familial late-onset Alzheimer's disease, occurring in about 52% of all cases of familial Alzheimer's disease compared to 16% in healthy controls (Strittmatter *et al.*, 1993). In elderly people without dementia, the ApoE  $\epsilon$ 4 genotype is associated with over twice the risk for developing Alzheimer's disease (Slooter

*et al.*, 1999). In subjects with amnesic mild cognitive impairment (MCI), the presence of the ApoE  $\epsilon$ 4 genotype has been demonstrated to be a strong predictor in the progression towards Alzheimer's disease (Petersen *et al.*, 1995; Tierney *et al.*, 1996; Buerger *et al.*, 2005).

Several lines of research suggest that the ApoE  $\epsilon$ 4 genotype may be associated with Alzheimer's disease by its role in the development of amyloid pathology. *Post-mortem* studies have shown that the ApoE  $\epsilon$ 4 genotype

is associated with an increase in the production of beta-amyloid (A $\beta$ ) (Ye *et al.*, 2005) and the formation of senile plaques in the cerebral cortex (Rebeck *et al.*, 1993; Schmechel *et al.*, 1993). Results from *in vitro* studies suggest that the ApoE protein of the  $\epsilon$ 4 isoform may regulate the generation of A $\beta$  (Puglielli *et al.*, 2003; Ye *et al.*, 2005).

The A $\beta$  peptide is generated from the transmembrane polypeptide called amyloid precursor protein (APP): APP is initially cleaved by  $\beta$ -secretase, which is pivotal for the subsequent cleavage of APP fragments by  $\gamma$ -secretase that results in the long fibrillar A $\beta$ <sub>1–40</sub> and A $\beta$ <sub>1–42</sub> peptides. In Alzheimer's disease, these peptides aggregate into plaques within the brain (Selkoe, 1994). Thus, BACE 1 activity is pivotal for the amyloidogenic processing of APP (Sinha and Lieberburg, 1999; Vassar *et al.*, 1999; Yan *et al.*, 1999). Recently, we have demonstrated increased levels of BACE 1 protein and enzymatic activity within the brain homogenate of the frontal and temporal cortex in Alzheimer's disease subjects (Yang *et al.*, 2003; Li *et al.*, 2004), further supporting the hypothesis that abnormal activity of BACE 1 is associated with Alzheimer's disease. For in depth review on BACE 1 please see Hampel & Shen, in press.

When assessing *in vivo* the CSF-concentration of BACE 1 activity, we have recently found increased levels of both BACE 1 measures in subjects with MCI when compared to healthy controls and Alzheimer's disease patients, demonstrating the presence of abnormal BACE 1 concentration already present in an at-risk group of Alzheimer's disease (Zhong *et al.*, 2007). Since the ApoE genotype has been linked to increased production and deposition of A $\beta$  (Strittmatter *et al.*, 1993, 1994), and BACE 1 is pivotal for the A $\beta$  generation, we hypothesized that the ApoE  $\epsilon$ 4 genotype is associated with increased levels of BACE 1 activity. Here, we investigated the CSF-levels of BACE 1 and A $\beta$ <sub>1–42</sub> as a surrogate marker of A $\beta$  within the brain samples of MCI and Alzheimer's disease subjects recruited from two different centres with expertise in neurodegenerative diseases. Since decreased levels of A $\beta$ <sub>1–42</sub>, as measured in CSF correlate with increased A $\beta$  deposition within the brain (Strozyk *et al.*, 2003), we further hypothesize that ApoE  $\epsilon$ 4 could be associated with decreased levels of A $\beta$ <sub>1–42</sub> in the CSF. We used CSF-based measurement of BACE 1 as a surrogate marker of BACE 1 within the brain, since previous studies have shown that CSF-based markers of Alzheimer's disease-specific pathology, such as A $\beta$ <sub>1–42</sub> or hyperphosphorylated tau at threonine 231 (p-tau<sub>231</sub>), correlated well with brain pathology in Alzheimer's disease (Strozyk *et al.*, 2003; Buerger *et al.*, 2006), and are accurate and reliable predictors of Alzheimer's disease even when assessed within a multi-centre context (Ewers *et al.*, 2007). In the current study, we examined whether BACE 1 and ApoE genotype could be also used as a surrogate marker in Alzheimer's disease and MCI subjects. For detailed review of biological marker research in insipient AD see Blennow & Hampel, 2003.

## Methods

### Patients

A total of 51 subjects with MCI, 60 patients with Alzheimer's disease and 37 elderly healthy controls (HC) were included in the study. The diagnosis of Alzheimer's disease was made according to the National Institute of Neurological and Communicative Disorders and Stroke (NINCDS) criteria (McKhann *et al.*, 1984). Amnesic MCI was diagnosed according to Mayo clinic criteria (Petersen *et al.*, 2001), i.e. MCI patients had memory performance 1.5 SD below the age-adjusted normal average, as assessed by the Consortium to Establish a Registry for Alzheimer's Disease (CERAD) cognitive battery, (Morris *et al.*, 1989) including verbal learning, recognition and recall tests. Global cognitive function and activities of daily living were unimpaired in the MCI subjects. CSF from cognitively normal controls was obtained as part of spinal anaesthesia for the primary purpose of surgery of the urinary tract or lower extremities. Psychiatric co-morbidity was excluded by history, clinical examination and Composite International Diagnostic Interview (CIDI) (Robins *et al.*, 1988). All controls were cognitively normal according to CERAD cognitive battery performance (within 1 SD in all subtests), and subjects had no complaints of cognitive impairment. To avoid spinal anaesthesia as a potential confounding factor when collecting CSF, CSF was obtained immediately after inserting the needle and just before application of the anaesthetic drug. Subjects were recruited at the department of psychiatry at the University of Munich, Germany, and the department of clinical neuroscience, at the University of Göteborg, Sahlgren's University Hospital, Sweden. The subject group included here is a sub-sample of subjects examined in our previous study on the differences of CSF-concentration of BACE 1 protein and BACE 1 activity between Alzheimer's disease, MCI and HC (Zhong *et al.*, 2007). In that study, 80 patients with Alzheimer's disease, 59 subjects with MCI and 69 HC were included. Mean levels of BACE 1 protein and activity in the CSF for each group were reported previously in that study (Zhong *et al.*, 2007). The current sub-sample results from the availability of blood-samples for the ApoE-genotype analysis. All procedures are approved by the institutional review boards (IRBs) of the respective institutions, and consent forms were signed by the patients before sample withdrawals.

The mean age, MMSE and gender distribution split-up for different ApoE genotype groups (see below) are shown in Table 1.

Within each diagnostic group, the subjects were split up into groups of ApoE- $\epsilon$ 4 carriers (ApoE  $\epsilon$ 3/4 and ApoE  $\epsilon$ 4/4) and respectively ApoE- $\epsilon$ 4 non-carriers (ApoE  $\epsilon$ 2/3 and ApoE  $\epsilon$ 3/3) in order to yield sufficiently large sample sizes for a statistical group comparison with regard to the ApoE- $\epsilon$ 4 genotype (Table 1). The ApoE groups within MCI or Alzheimer's disease subjects did not differ significantly in age or MMSE ( $P > 0.05$ ) scores. For the gender distribution between ApoE genotype groups, there were relatively more female than male patients within the ApoE- $\epsilon$ 4 carriers compared to ApoE- $\epsilon$ 4 non-carriers in the Alzheimer's disease patient group ( $P = 0.02$ , Table 1). Therefore, gender differences were controlled for in the statistical analysis of the ApoE genotype effect.

A minimum ApoE-genotype-related effect size of  $f = 0.33$  (in Alzheimer's disease) and  $f = 0.4$  (in MCI) could be detected with a power of 0.8 at a significance level of 0.05.

**Table 1** Demographic and clinical data for subjects with MCI or Alzheimer's disease

| Group               | Measure                | Genotype        |                     |
|---------------------|------------------------|-----------------|---------------------|
|                     |                        | ApoE-ε4 carrier | ApoE-ε4 non-carrier |
| Alzheimer's disease | Sample size            | 35              | 25                  |
|                     | Gender (f/m)*          | 25/10           | 15/10               |
|                     | Mean age in years (SD) | 68.3 (8.6)      | 69.1 (10.7)         |
|                     | Mean MMSE (SD)         | 19.7 (4.1)      | 21.3 (3.8)          |
| MCI                 | Sample size            | 31              | 20                  |
|                     | Gender (f/m)           | 17/14           | 9/11                |
|                     | Mean age in years (SD) | 69.7 (6.8)      | 72.4 (8.0)          |
|                     | Mean MMSE (SD)         | 26.5 (2.3)      | 26.7 (2.1)          |
| HC                  | Sample size            | 6               | 31                  |
|                     | Gender (f/m)           | 3/3             | 16/15               |
|                     | Mean age in years (SD) | 63.3 (7.8)      | 67.4 (7.3)          |
|                     | Mean MMSE (SD)         | 29.3 (8.1)      | 29.5 (8.1)          |

f = female, m = male. \*Gender distribution differed between genotype groups:  $\chi^2 = 7.5$ ,  $P = 0.02$ .

### ApoE genotyping

ApoE genotyping was performed according to standard procedures using a polymerase chain reaction (PCR) kit for the Light Cycler (Roche Diagnostics, Mannheim, Germany).

For the Alzheimer's disease group, the frequency of the different ApoE genotypes was as follows: ApoE ε2/2 ( $n = 1$ ), ApoE ε2/3 ( $n = 3$ ), ApoE ε3/3 ( $n = 21$ ), ApoE ε3/4 ( $n = 28$ ) and ApoE ε4/4 ( $n = 7$ ). For the MCI group, the frequency of the different ApoE genotypes was as follows: ApoE ε2/3 genotype ( $n = 1$ ), ApoE ε3/3 ( $n = 19$ ), ApoE ε3/4 ( $n = 24$ ) and ApoE ε4/4 ( $n = 7$  patients). For the analysis of the ApoE genotype effect, groups were binarized into ApoE ε4 carriers and ApoE ε4 non-carriers. Thus, the Alzheimer's disease group included a total of 35 ApoE ε4 carriers and 25 ApoE ε4 non-carriers; the MCI group included 31 ApoE ε4 carriers and 20 ApoE ε4 non-carriers. The HC group included: ApoE ε2/2 ( $n = 1$ ), ApoE ε2/3 ( $n = 3$ ), ApoE ε3/3 ( $n = 27$ ), ApoE ε3/4 ( $n = 6$ ).

### BACE 1 protein level analysis

Two BACE 1 protein sandwich-ELISAs were established as we recently published (Zhong *et al.*, 2007): one used a combination of anti-BACE 1 polyclonal antibody SECB2 as a capture antibody, and biotinylated anti-BACE 1 polyclonal antibody SECB1 as a detection antibody. The other ELISA was established by using the anti-BACE 1 polyclonal antibody, B280, as a capture antibody, and anti-BACE 1 monoclonal antibody, (R&D), as a detection antibody. Recombinant BACE 1 from Amgen was used as the standard, and all were assayed under the same conditions. BACE 1 concentration was calculated from the standard curve and expressed as micrograms per millilitre. Previously, we have described this method in great detail (Zhong *et al.*, 2007).

### BACE 1 enzymatic activity assay

Activity assays of BACE 1 were performed by using synthetic peptide substrates containing the BACE 1 cleavage site (MCA-Glu-Val-Lys-Met-Asp-Ala-Glu-Phe-(Lys-DNP)-OH) at 50 mM concentration in reaction buffer (50 mM acetic acid pH 4.1, 100 mM NaCl) (Zhong *et al.*, 2007). To examine the BACE 1 activity, we

used 10 ul of CSF from each sample. The fluorescence was observed by the fluorescent microplate reader with excitation wavelength at 320 nm and emission wavelength at 383 nm. CSF-BACE 1 activity was tested in the presence of the BACE 1 inhibitor (Calbiochem), which revealed about 80% inhibition of the CSF-BACE 1 activity.

Regarding the pH condition, the best range of pH for detection of BACE 1 activity has been found to be between 4 and 5 acidic conditions; for our substrate the best pH ranged from 4.0 to 4.5 (Vassar *et al.*, 1999). The condition we chose was within this range (pH 4.1), in which BACE 1 showed over 95% activity. The substrate and pH range chosen enabled the detection of BACE 1 activity regardless of its form, as long as it had the ability to cleave the substrate. Therefore, the BACE 1 activity measured here should best be regarded as total BACE 1 activity.

### Aβ<sub>1-42</sub> concentration

Aβ<sub>1-42</sub> ELISA concentration was determined by INNOTEST β-amyloid (1-42) (Innogenetics, Ghent, Belgium). The assay and its characteristics have been described in detail previously (Vanderstichele *et al.*, 2000).

### Statistics

Differences in CSF-levels of BACE 1 activity, BACE 1 protein and Aβ<sub>1-42</sub> between Alzheimer's disease, MCI and HC were analysed through separate analyses of covariance (ANCOVAs) with diagnosis, gender and ApoE genotype as fixed factors, and age as covariate. A significant main effect of diagnosis ( $P < 0.05$ ) was followed up by pair-wise comparisons of the groups.

Differences between ApoE-ε4 carriers and ApoE-ε4 non-carriers in levels of BACE 1 activity and Aβ<sub>1-42</sub> were computed, using ANCOVA models with ApoE group and gender as independent variables, and MMSE and age as covariates. In order to control for the influence of possible outliers and the accumulation of Type I error due to multiple comparisons, bootstrapping, within a multiple regression model including ApoE group, gender, MMSE and age, was conducted for each group comparison (Efron and Tibshirani, 1986). The asymptotic 95% confidence intervals (95% CI) of the beta-regression weight (B) of the factor 'ApoE genotype' estimated upon a basis of 999 iterations of samplings are reported. An effect is statistically significant at significance level of the  $\alpha = 0.05$ , if the 95% CI does not include the value zero, i.e. the regression weight is significantly different from zero. The HC group was included here to test whether the concentration of BACE 1 activity and Aβ<sub>1-42</sub> was abnormal in the MCI and Alzheimer's disease groups. Since there were only six ApoE ε4 carriers in the HC sample in comparison to 31 ApoE ε4 non-carriers, ApoE genotype difference was not calculated within the HC group, rather only the MCI and Alzheimer's disease groups. All analyses were conducted using SPSS 13.01 (SPSS Inc., Chicago, USA).

### Results

#### CSF-levels of BACE 1 activity, BACE 1 protein and Aβ<sub>1-42</sub> in MCI and Alzheimer's disease

Consistent with our previous results (Zhong *et al.*, 2007), BACE 1 activity in CSF was significantly increased in subjects with MCI when compared to Alzheimer's disease

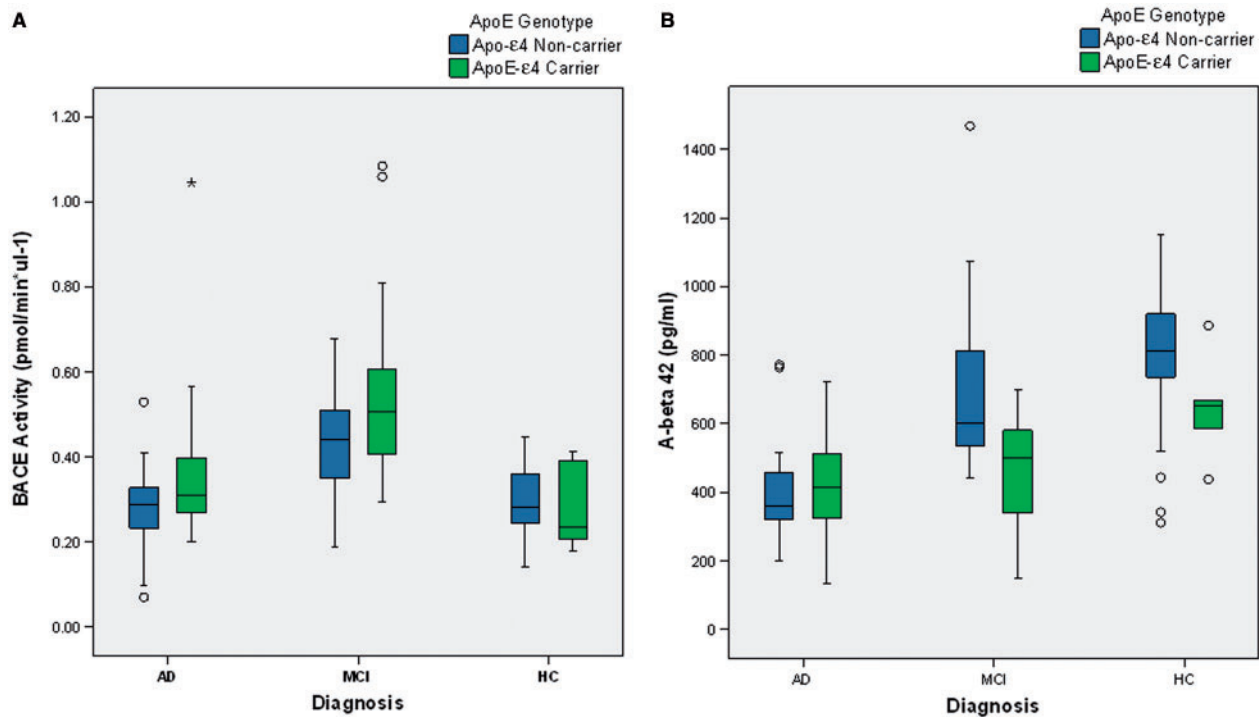

**Fig. 1** Boxplot of CSF-levels of BACE I activity (**A**) and  $A\beta_{1-42}$  (**B**) as a function of ApoE genotype and diagnosis. The empty circles indicate a deviation by 1.5–3 box lengths and the stars indicated extreme values deviating by more than 3 box lengths from the upper or lower edge of the box. The box length is the interquartile range. Note that the result pattern of the analysis of differences between diagnostic groups remained, when extreme values were removed from the analysis.

[ $F(8,102) = 36.58$ ,  $P < 0.001$ ] or HC [ $F(8,79) = 36.58$ ,  $P < 0.001$ ], however, no significant difference was observed between Alzheimer's disease and HC ( $F < 1$ ). BACE 1 protein concentration was significantly increased in subjects with MCI compared to HC [ $F(1,79) = 27.6$ ,  $P < 0.001$ ] and Alzheimer's disease [ $F(1,129) = 17.2$ ,  $P < 0.001$ ], but the difference between Alzheimer's disease and HC was not significant ( $F < 1$ ). Decreased levels of  $A\beta_{1-42}$  were observed in patients with Alzheimer's disease when compared to MCI [ $F(1,73) = 14.44$ ,  $P < 0.001$ ] and MCI was lower than HC [ $F(1, 57) = 5.58$ ,  $P = 0.02$ ]. The interaction between the diagnosis and gender was not significant for any of the outcome measures ( $P > 0.05$ ).

### Association between ApoE genotype and BACE I

For Alzheimer's disease patients, the CSF-level of BACE 1 activity revealed a statistically significant increase in ApoE- $\epsilon 4$  carriers [ $F(1,54) = 5.22$ ,  $P = 0.03$ , Fig. 1A, Table 2], and was confirmed in the bootstrap analysis ( $B = 0.078$ , 95% CI = 0.73–0.84). Neither gender nor the interaction between ApoE genotype and gender were significant. For BACE protein levels, no significant group differences were detected ( $F < 1$ , Table 2).

For MCI patients, BACE 1 activity showed a significant increase in ApoE- $\epsilon 4$  carriers (Fig. 1A, Table 2) compared to ApoE- $\epsilon 4$  non-carriers [ $F(1,45) = 4.48$ ,  $P = 0.04$ ].

Bootstrapping of the main effect of the ApoE genotype confirmed a statistically significant effect ( $B = 0.111$ , 95% CI = 0.104–0.116). However, the interaction between the ApoE genotype and gender did not reach statistical significance ( $P = 0.07$ ). BACE 1 protein levels did not differ between ApoE genotype groups ( $F < 1$ , Table 2). Since the sample size of ApoE- $\epsilon 4$  carriers in HC was too small ( $n = 6$ ) no statistical test on the effect of ApoE genotype on BACE 1 was computed for the HC group. For descriptive comparison, the mean values of BACE 1 activity and BACE 1 protein for ApoE- $\epsilon 4$  carriers and ApoE- $\epsilon 4$  non-carriers for each group are displayed in Table 2.

### Association between ApoE genotype and $A\beta_{1-42}$

For Alzheimer's disease patients, no group differences between ApoE genotypes were observed ( $p = 0.63$ , Fig. 1B).

In MCI, levels of  $A\beta_{1-42}$  were decreased in ApoE- $\epsilon 4$  carriers when compared to ApoE- $\epsilon 4$  non-carriers. This significant difference ( $P = 0.004$ , Fig. 1B, Table 2) was confirmed by bootstrapping (95%CI =  $-357.76$  to  $-96.37$ ); however, the interaction between the ApoE genotype and gender was not significant ( $P = 0.94$ ).

For a descriptive comparison, the mean values of  $A\beta_{1-42}$  for ApoE- $\epsilon 4$  carriers and ApoE- $\epsilon 4$  non-carriers are displayed in Table 2.



**Table 2** Descriptive results of BACE activity, BACE protein and A $\beta_{1-42}$  for both ApoE genotype groups in Alzheimer's disease, MCI and HC

| Group               | Measure                           | Genotype                   |                                |
|---------------------|-----------------------------------|----------------------------|--------------------------------|
|                     |                                   | ApoE- $\epsilon$ 4 carrier | ApoE- $\epsilon$ 4 non-carrier |
| Alzheimer's disease | BACE activity (pmol/min/ $\mu$ l) | 0.35 (0.15)                | 0.28 (0.1)*                    |
|                     | BACE protein ( $\mu$ g/ml)        | 0.99 (0.64)                | 0.97 (0.46)                    |
| MCI                 | A $\beta_{1-42}$ (pg/ml)          | 419.11 (141.93)            | 414.21 (145.93)                |
|                     | BACE activity (pmol/min/ $\mu$ l) | 0.54 (0.19)                | 0.43 (0.14)*                   |
| HC                  | BACE protein ( $\mu$ g/ml)        | 2.15 (1.39)                | 1.84 (1.14)                    |
|                     | A $\beta_{1-42}$ (pg/ml)          | 458.3 (161.97)             | 722.8 (275.92)*                |
|                     | BACE activity (pmol/min/ $\mu$ l) | 0.28 (0.1)                 | 0.3 (0.08)                     |
|                     | BACE protein ( $\mu$ g/ml)        | 0.76 (0.4)                 | 0.99 (0.98)                    |
|                     | A $\beta_{1-42}$ (pg/ml)          | 646.4 (162.44)             | 801.08 (217.49)                |

\*ApoE genotype effect significant ( $P < 0.05$ ).

## Discussion

The expression of the ApoE- $\epsilon$ 4 allele has been associated with increased production of A $\beta$  pathology (Ye *et al.*, 2005). We have recently developed a CSF-based assay for the *in vivo* detection of BACE 1 protein and BACE 1 activity (Zhong *et al.*, 2007), a secretase which has been implicated in the generation A $\beta_{1-42}$ . Here we examined the effect of BACE 1 activity and protein levels in CSF. Although there was no change in BACE 1 protein CSF-levels, we found that BACE 1 activity was increased within ApoE- $\epsilon$ 4 carriers when compared to ApoE- $\epsilon$ 4 non-carriers in both MCI and Alzheimer's disease as confirmed by bootstrapping. These results show, for the first time, an association between the ApoE genotype and BACE 1 activity as measured in CSF of Alzheimer's disease and MCI subjects.

Consistent with the findings in our previous study, the concentration of BACE 1 activity and BACE 1 protein was significantly increased in MCI subjects when compared to HC and Alzheimer's disease, thus replicating our previous findings in the overall sample (Zhong *et al.*, 2007). For A $\beta_{1-42}$ , we found a decrease in both MCI and Alzheimer's disease subjects when compared to HC, which is consistent with previous findings (Hampel *et al.*, 2004; Herukka *et al.*, 2007).

For the ApoE- $\epsilon$ 4 genotype, the current results suggest an enhancement of CSF-BACE 1 activity in association with MCI and Alzheimer's disease subjects. Since previous studies have shown that CSF-levels of biomarkers, such as A $\beta_{1-42}$  and p-tau<sub>231</sub>, correlate with the deposition of A $\beta$  and neurofibrillary pathology found within the brain

(Strozyk *et al.*, 2003; Buerger *et al.*, 2006), CSF-based measures may provide an excellent way to assess *in vivo* Alzheimer's disease-specific pathology in the brain. Thus, the current findings of elevated BACE 1 activity in CSF may suggest that the ApoE genotype is associated with higher cerebral BACE 1 activity within the brain in both MCI and Alzheimer's disease subjects. However, it is not clear how the expression of the ApoE genotype may lead to increased BACE 1 activity and A $\beta$  generation within the brain. One possibility is that ApoE influences the production of A $\beta$  via modulation of cholesterol levels. Studies in patients with Alzheimer's disease have shown that the ApoE- $\epsilon$ 4 genotype is associated with increased cholesterol levels in both blood (Corder *et al.*, 1993; Notkola *et al.*, 1998) and CSF as measured by the metabolite 24S-hydroxycholesterol (Papassotiropoulos *et al.*, 2002; Leoni *et al.*, 2006). *In vitro* and *in vivo* experiments have shown that increased levels of cholesterol are associated with enhanced activity of  $\alpha$ ,  $\beta$  and  $\gamma$ -secretases (Fassbender *et al.*, 2001; Kojro *et al.*, 2001; Runz *et al.*, 2002). Thus, ApoE may lead to increased levels of cholesterol and thereby BACE 1 activity (Puglielli *et al.*, 2003; Lahiri *et al.*, 2004). Alternatively, ApoE- $\epsilon$ 4 expression may increase BACE 1 activity via increased APP endocytosis in a cholesterol-independent way (Ye *et al.*, 2005), and may lead to an increased exposure of BACE 1 to APP within the cell compartments such as endosomes, which eventually enhances the amyloidogenic processing of APP (Koo and Squazzo, 1994). If accumulated within the neuron, however, it is currently not clear how BACE 1 would escape into CSF, leading to increased CSF-levels of BACE 1 activity. Potentially, BACE 1 may be released either by active transport, degeneration of the membrane or neuronal death. However, such a link has not been described yet, and thus remains unclear.

A third possibility is the influence of ApoE on A $\beta$  generation within the cerebral microvasculature. Neuropathological studies have shown that damage of the endothelium of the cerebral capillary microvasculature is a frequently observed brain abnormality in Alzheimer's disease subjects (Bailey *et al.*, 2004) and has been associated with A $\beta$  (Thomas *et al.*, 1996; Deane *et al.*, 2003; de la Torre, 2004; Zlokovic, 2005). The ApoE  $\epsilon$ 4 genotype may especially affect the amyloidosis within the cerebral vasculature, serving both as a chaperone of A $\beta$  and potentially increasing the production of A $\beta$ . Smooth muscle cells of cerebral vessels have been shown to produce A $\beta$  *in situ* (Frackowiak *et al.*, 1995), where the presence of ApoE  $\epsilon$ 4 leads to the increase of amyloidogenic processing of APP, possibly linked to increased oxidative stress (Mazur-Kolecka *et al.*, 2004). Thus, increased BACE 1 activity in ApoE  $\epsilon$ 4 carrier may partially reflect ApoE- $\epsilon$ 4 regulated A $\beta$  production within the vasculature. Alternatively, ApoE may have a role in the accumulation and clearance of A $\beta$  at the blood-brain barrier (Holtzman *et al.*, 2000). Future studies will need to address the

mechanism that may underlie the ApoE-associated increase in BACE 1 activity.

Note that BACE 1 activity but not BACE 1 protein level in CSF was associated with the ApoE genotype. We previously reported a relatively low correlation between BACE 1 activity and BACE 1 protein levels (Zhong *et al.*, 2007). One explanation of the lack of the correlation may be that activation of BACE 1 may occur only in the glycolysation-dependent mature form of the BACE 1 protein, whereas the current assay detects both the mature and immature forms of BACE 1 protein (Zhong *et al.*, 2007). Thus, it is possible that despite the lack of an association between total BACE 1 protein levels and the ApoE genotype, the mature sub-form of BACE 1 protein, which we found to be highly correlated with BACE 1 activity (Zhong *et al.*, 2007), may still be affected by the ApoE genotype.

Parallel to the differences in BACE 1 activity, we found a difference in the CSF-levels of  $A\beta_{1-42}$  between ApoE- $\epsilon 4$  carriers and non-carriers in MCI. The ApoE- $\epsilon 4$  carriers show a decrease in levels of  $A\beta_{1-42}$  in MCI subjects, which suggests an increase of cerebral  $A\beta$  deposition within the brain of ApoE- $\epsilon 4$  carriers (Strozyk *et al.*, 2003). In contrast, we did not detect a difference between genotype groups in Alzheimer's disease subjects. Previous studies in Alzheimer's disease have shown inconsistent results, with some studies reporting a decrease (Tapiola *et al.*, 1997; Galasko *et al.*, 1998) in CSF-levels  $A\beta_{1-42}$ , while others did not find such an effect of the ApoE genotype (Motter *et al.*, 1995; Nitsch *et al.*, 1995). Discrepancies between the findings may partially be due to the methodological aspects, such as varying sample size, where those studies that did not find an association between the ApoE genotype and CSF-levels  $A\beta_{1-42}$  were relatively small. In addition to methodological differences, ApoE- $\epsilon 4$  allele frequency may be relevant, as the number of ApoE- $\epsilon 4$  is linearly correlated with a decrease in  $A\beta_{1-42}$  (Galasko *et al.*, 1998). In the present study, the frequency of homozygous ApoE- $\epsilon 4$  genotype was with 11.7% substantially lower than in Galasko *et al.*'s (1998) study (21.1%) that found a significant decrease in  $A\beta_{1-42}$  associated with ApoE- $\epsilon 4$ .

It should be noted that in the current study, amnesic MCI subjects were included. Although amnesic MCI subjects have been reported to convert to Alzheimer's disease at a mean rate of 10–15% annually, some may return to normal or remain stable for several years. Thus, the current sample of amnesic MCI patients may include a diversity of pathology or even an absence of any neuropathology. Follow-up assessment of the MCI subjects is warranted in order to determine whether the subjects progress to Alzheimer's disease.

A follow-up study is underway to determine whether the BACE 1 activity levels measured in CSF are predictive of the conversion of from MCI to Alzheimer's disease.

## Acknowledgements

The study was supported by grants from the by National Institute on Aging (NIHRO1AG025888) (Y.S.) Alzheimer's Association Zenith Award (Y.S.), Arizona Alzheimer Research Consortium (Y.S.) and the Bundesministerium fuer Bildung und Forschung (Federal Agency of Education and Research, BMBF 01 G1 0102, H.H., S.J.T, M.E.) to the Competence Network of Dementia. The authors thank Y. Hoessler, K. Knoll, F. Jancu, L. Jertila-Aqil, C. Sanger and Gina Ciavarella for technical assistance.

## References

- Bailey TL, Rivara CB, Rocher AB, Hof PR. The nature and effects of cortical microvascular pathology in aging and Alzheimer's disease. *Neurol Res* 2004; 26: 573–8.
- Blennow K, Hampel H. Cerebrospinal fluid markers for incipient Alzheimer's disease. *Lancet Neurol* 2003; 2: 605–13.
- Buerger K, Ewers M, Andreasen N, Zinkowski R, Ishiguro K, Vanmechelen E, et al. Phosphorylated tau predicts rate of cognitive decline in MCI subjects: a comparative CSF study. *Neurology* 2005; 65: 1502–3.
- Buerger K, Ewers M, Pirttila T, Zinkowski R, Alafuzoff I, Teipel SJ, et al. CSF phosphorylated tau protein correlates with neocortical neurofibrillary pathology in Alzheimer's disease. *Brain* 2006; 129: 3035–41.
- Corder EH, Saunders AM, Strittmatter WJ, Schmechel DE, Gaskell PC, Small GW, et al. Gene dose of apolipoprotein E type 4 allele and the risk of Alzheimer's disease in late onset families. *Science* 1993; 261: 921–3.
- de la Torre JC. Is Alzheimer's disease a neurodegenerative or a vascular disorder? Data, dogma, and dialectics. *Lancet Neurol* 2004; 3: 184–90.
- Deane R, Du Yan S, Subramanian RK, LaRue B, Jovanovic S, Hogg E, et al. RAGE mediates amyloid-beta peptide transport across the blood-brain barrier and accumulation in brain. *Nat Med* 2003; 9: 907–13.
- Efron B, Tibshirani R. Bootstrap methods for standard errors, confidence intervals, and other measures of statistical accuracy. *Stat Sci* 1986; 1: 54–77.
- Ewers M, Buerger K, Teipel SJ, Scheltens P, Schroder J, Zinkowski RP, et al. Multicenter assessment of CSF-phosphorylated tau for the prediction of conversion of MCI. *Neurology* 2007; 69: 2205–12.
- Fassbender K, Simons M, Bergmann C, Stroick M, Lutjohann D, Keller P, et al. Simvastatin strongly reduces levels of Alzheimer's disease beta-amyloid peptides Abeta 42 and Abeta 40 in vitro and in vivo. *PNAS* 2001; 98: 5856–61.
- Frackowiak J, Mazur-Kolecka B, Wisniewski HM, Potempska A, Carroll RT, Emmerling MR, et al. Secretion and accumulation of Alzheimer's beta-protein by cultured vascular smooth muscle cells from old and young dogs. *Brain Res* 1995; 676: 225–30.
- Galasko D, Chang L, Motter R, Clark CM, Kaye J, Knopman D, et al. High cerebrospinal fluid tau and low amyloid {beta}42 levels in the clinical diagnosis of Alzheimer disease and relation to Apolipoprotein E genotype. *Arch Neurol* 1998; 55: 937–45.
- Hampel H, Shen Y. Beta-site amyloid precursor protein cleaving enzyme 1 (BACE 1) as a biological marker of Alzheimer's disease. *Scand J Clin Lab Invest* 2008.
- Hampel H, Teipel SJ, Fuchsberger T, Andreasen N, Wiltfang J, Otto M, et al. Value of CSF beta-amyloid1-42 and tau as predictors of Alzheimer's disease in patients with mild cognitive impairment. *Mol Psychiatry* 2004; 9: 705–10.
- Herukka SK, Helisalmi S, Hallikainen M, Tervo S, Soinen H, Pirttila T. CSF abeta42, tau and phosphorylated tau, APOE epsilon4 allele and MCI type in progressive MCI. *Neurobiol Aging* 2007; 28: 507–14.

- Holtzman DM, Bales KR, Tenkova T, Fagan AM, Parsadanian M, Sartorius LJ, et al. Apolipoprotein E isoform-dependent amyloid deposition and neuritic degeneration in a mouse model of Alzheimer's disease. *Proc Natl Acad Sci USA* 2000; 97: 2892–7.
- Kojro E, Gimpl G, Lammich S, Marz W, Fahrenholz F. From the cover: low cholesterol stimulates the nonamyloidogenic pathway by its effect on the alpha -secretase ADAM 10. *PNAS* 2001; 98: 5815–20.
- Koo E, Squazzo S. Evidence that production and release of amyloid beta-protein involves the endocytic pathway. *J Biol Chem* 1994; 269: 17386–9.
- Lahiri DK, Sambamurti K, Bennett DA. Apolipoprotein gene and its interaction with the environmentally driven risk factors: molecular, genetic and epidemiological studies of Alzheimer's disease. *Neurobiol Aging* 2004; 25: 651–60.
- Leoni V, Shafaati M, Salomon A, Kivipelto M, Bjorkhem I, Wahlund LO. Are the CSF levels of 24S-hydroxycholesterol a sensitive biomarker for mild cognitive impairment? *Neurosci Lett* 2006; 397: 83–7.
- Li R, Lindholm K, Yang LB, Yue X, Citron M, Yan R, et al. Amyloid beta peptide load is correlated with increased beta-secretase activity in sporadic Alzheimer's disease patients. *Proc Natl Acad Sci USA* 2004; 101: 3632–7.
- Mazur-Kolecka B, Kowal D, Sukontasup T, Dickson D, Frackowiak J. The effect of oxidative stress on amyloid precursor protein processing in cells engaged in beta-amyloidosis is related to apolipoprotein E genotype. *Acta Neuropathol* 2004; 108: 287–94.
- McKhann G, Drachman D, Folstein M, Katzman R, Price D, Stadlan EM. Clinical diagnosis of Alzheimer's disease: report of the NINCDS-ADRDA Work Group under the auspices of Department of Health and Human Services Task Force on Alzheimer's disease. *Neurology* 1984; 34: 939–44.
- Morris JC, Heyman A, Mohs RC, Hughes JP, van Belle G, Fillenbaum G, et al. The Consortium to Establish a Registry for Alzheimer's Disease (CERAD). Part I. Clinical and neuropsychological assessment of Alzheimer's disease. *Neurology* 1989; 39: 1159–65.
- Motter R, Vigo-Pelfrey C, Kholodenko D, Barbour R, Johnson-Wood K, Galasko D, et al. Reduction of beta-amyloid peptide42 in the cerebrospinal fluid of patients with Alzheimer's disease. *Ann Neurol* 1995; 38: 643–8.
- Nitsch RM, Rebeck GW, Deng M, Richardson UI, Tennis M, Schenk DB, et al. Cerebrospinal fluid levels of amyloid beta-protein in Alzheimer's disease: inverse correlation with severity of dementia and effect of apolipoprotein E genotype. *Ann Neurol* 1995; 37: 512–8.
- Notkola IL, Sulkava R, Pekkanen J, Erkinjuntti T, Ehnholm C, Kivinen P, et al. Serum total cholesterol, apolipoprotein E epsilon 4 allele, and Alzheimer's disease. *Neuroepidemiology* 1998; 17: 14–20.
- Papassotiropoulos A, Lutjohann D, Bagli M, Locatelli S, Jessen F, Buschfort R, et al. 24S-hydroxycholesterol in cerebrospinal fluid is elevated in early stages of dementia. *J Psychiatr Res* 2002; 36: 27–32.
- Petersen RC, Doody R, Kurz A, Mohs RC, Morris JC, Rabins PV, et al. Current concepts in mild cognitive impairment. *Arch Neurol* 2001; 58: 1985–92.
- Petersen RC, Smith GE, Ivnik RJ, Tangalos EG, Schaid DJ, Thibodeau SN, et al. Apolipoprotein E status as a predictor of the development of Alzheimer's disease in memory-impaired individuals. *J Am Med Assoc* 1995; 273: 1274–8.
- Puglielli L, Tanzi RE, Kovacs DM. Alzheimer's disease: the cholesterol connection. *Nat Neurosci* 2003; 6: 345–51.
- Rebeck GW, Reiter JS, Strickland DK, Hyman BT. Apolipoprotein E in sporadic Alzheimer's disease: allelic variation and receptor interactions. *Neuron* 1993; 11: 575–80.
- Robins LN, Wing J, Wittchen HU, Helzer JE, Babor TF, Burke J, et al. The Composite International Diagnostic Interview. An epidemiologic instrument suitable for use in conjunction with different diagnostic systems and in different cultures. *Arch Gen Psychiatry* 1988; 45: 1069–77.
- Runz H, Rietdorf J, Tomic I, de Bernard M, Beyreuther K, Pepperkok R, et al. Inhibition of intracellular cholesterol transport alters presenilin localization and amyloid precursor protein processing in neuronal cells. *J Neurosci* 2002; 22: 1679–89.
- Schmechel DE, Saunders AM, Strittmatter WJ, Crain BJ, Hulette CM, Joo SH, et al. Increased amyloid beta-peptide deposition in cerebral cortex as a consequence of apolipoprotein E genotype in late-onset Alzheimer disease. *Proc Natl Acad Sci USA* 1993; 90: 9649–53.
- Selkoe DJ. Alzheimer's disease: a central role for amyloid. *J Neuropathol Exp Neurol* 1994; 53: 438–47.
- Sinha S, Lieberburg I. Cellular mechanisms of beta-amyloid production and secretion. *Proc Natl Acad Sci USA* 1999; 96: 11049–53.
- Slooter AJ, Houwing-Duistermaat JJ, van Harskamp F, Cruts M, Van Broeckhoven C, Bretelet MM, et al. Apolipoprotein E genotype and progression of Alzheimer's disease: the Rotterdam Study. *J Neurol* 1999; 246: 304–8.
- Strittmatter W, Saunders A, Goedert M, Weisgraber K, Dong L, Jakes R, et al. Isoform-specific interactions of Apolipoprotein E with microtubule-associated protein tau: implications for Alzheimer disease. *PNAS* 1994; 91: 11183–6.
- Strittmatter WJ, Saunders AM, Schmechel D, Pericak-Vance M, Enghild J, Salvesen GS, et al. Apolipoprotein E: high-avidity binding to beta-amyloid and increased frequency of type 4 allele in late-onset familial Alzheimer disease. *Proc Natl Acad Sci USA* 1993; 90: 1977–81.
- Strozyk D, Blennow K, White LR, Launer LJ. CSF Abeta 42 levels correlate with amyloid-neuropathology in a population-based autopsy study. *Neurology* 2003; 60: 652–6.
- Tapiola T, Overmyer M, Lehtovirta M, Helisalmi S, Ramberg J, Alafuzoff I, et al. The level of cerebrospinal fluid tau correlates with neurofibrillary tangles in Alzheimer's disease. *Neuroreport* 1997; 8: 3961–3.
- Thomas T, Thomas G, McLendon C, Sutton T, Mullan M. beta-Amyloid-mediated vasoactivity and vascular endothelial damage. *Nature* 1996; 380: 168–71.
- Tierney MC, Szalai JP, Snow WG, Fisher RH, Nores A, Nadon G, et al. Prediction of probable Alzheimer's disease in memory-impaired patients: a prospective longitudinal study. *Neurology* 1996; 46: 661–5.
- Vanderstichele H, Van Kerschaver E, Hesse C, Davidsson P, Buyse MA, Andreasen N, et al. Standardization of measurement of beta-amyloid (1–42) in cerebrospinal fluid and plasma. *Amyloid* 2000; 7: 245–58.
- Vassar R, Bennett BD, Babu-Khan S, Kahn S, Mendiaz EA, Denis P, et al. Beta-secretase cleavage of Alzheimer's amyloid precursor protein by the transmembrane aspartic protease BACE. *Science* 1999; 286: 735–41.
- Yan SD, Roher A, Schmidt AM, Stern DM. Cellular cofactors for amyloid beta-peptide-induced cell stress. Moving from cell culture to in vivo. *Am J Pathol* 1999; 155: 1403–11.
- Yang LB, Lindholm K, Yan R, Citron M, Xia W, Yang XL, et al. Elevated beta-secretase expression and enzymatic activity detected in sporadic Alzheimer disease. *Nat Med* 2003; 9: 3–4.
- Ye S, Huang Y, Mullendorff K, Dong L, Giedt G, Meng EC, et al. Apolipoprotein (apo) E4 enhances amyloid beta peptide production in cultured neuronal cells: apoE structure as a potential therapeutic target. *Proc Natl Acad Sci USA* 2005; 102: 18700–5.
- Zhong Z, Ewers M, Teipel S, Burger K, Wallin A, Blennow K, et al. Levels of beta-secretase (BACE 1) in cerebrospinal fluid as a predictor of risk in mild cognitive impairment. *Arch Gen Psychiatry* 2007; 64: 718–26.
- Zlokovic BV. Neurovascular mechanisms of Alzheimer's neurodegeneration. *Trends Neurosci* 2005; 28: 202–8.
